# Supplementary material
Source: ML conference proceedings conference paper supplement (https://openreview.net/forum?id=orEX9GKQAD)

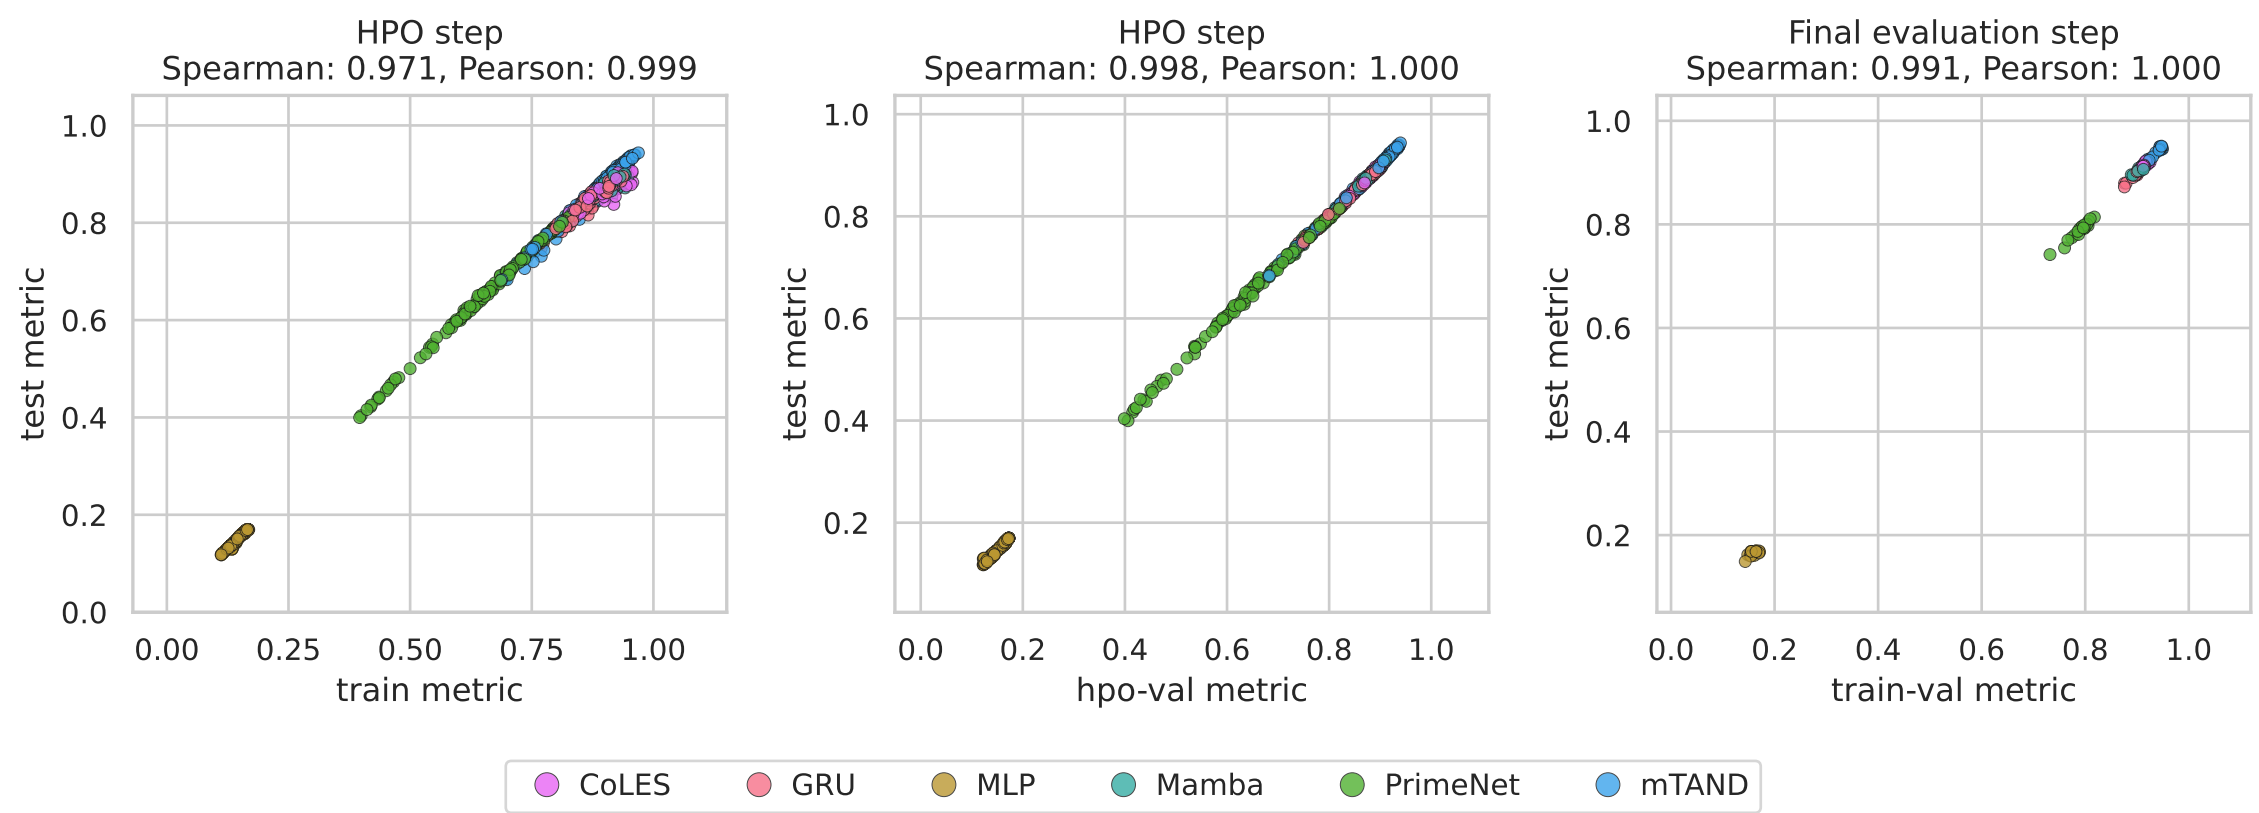

Supplement: supplementary_material [file attachment]

Retail. Metric progression with train data size

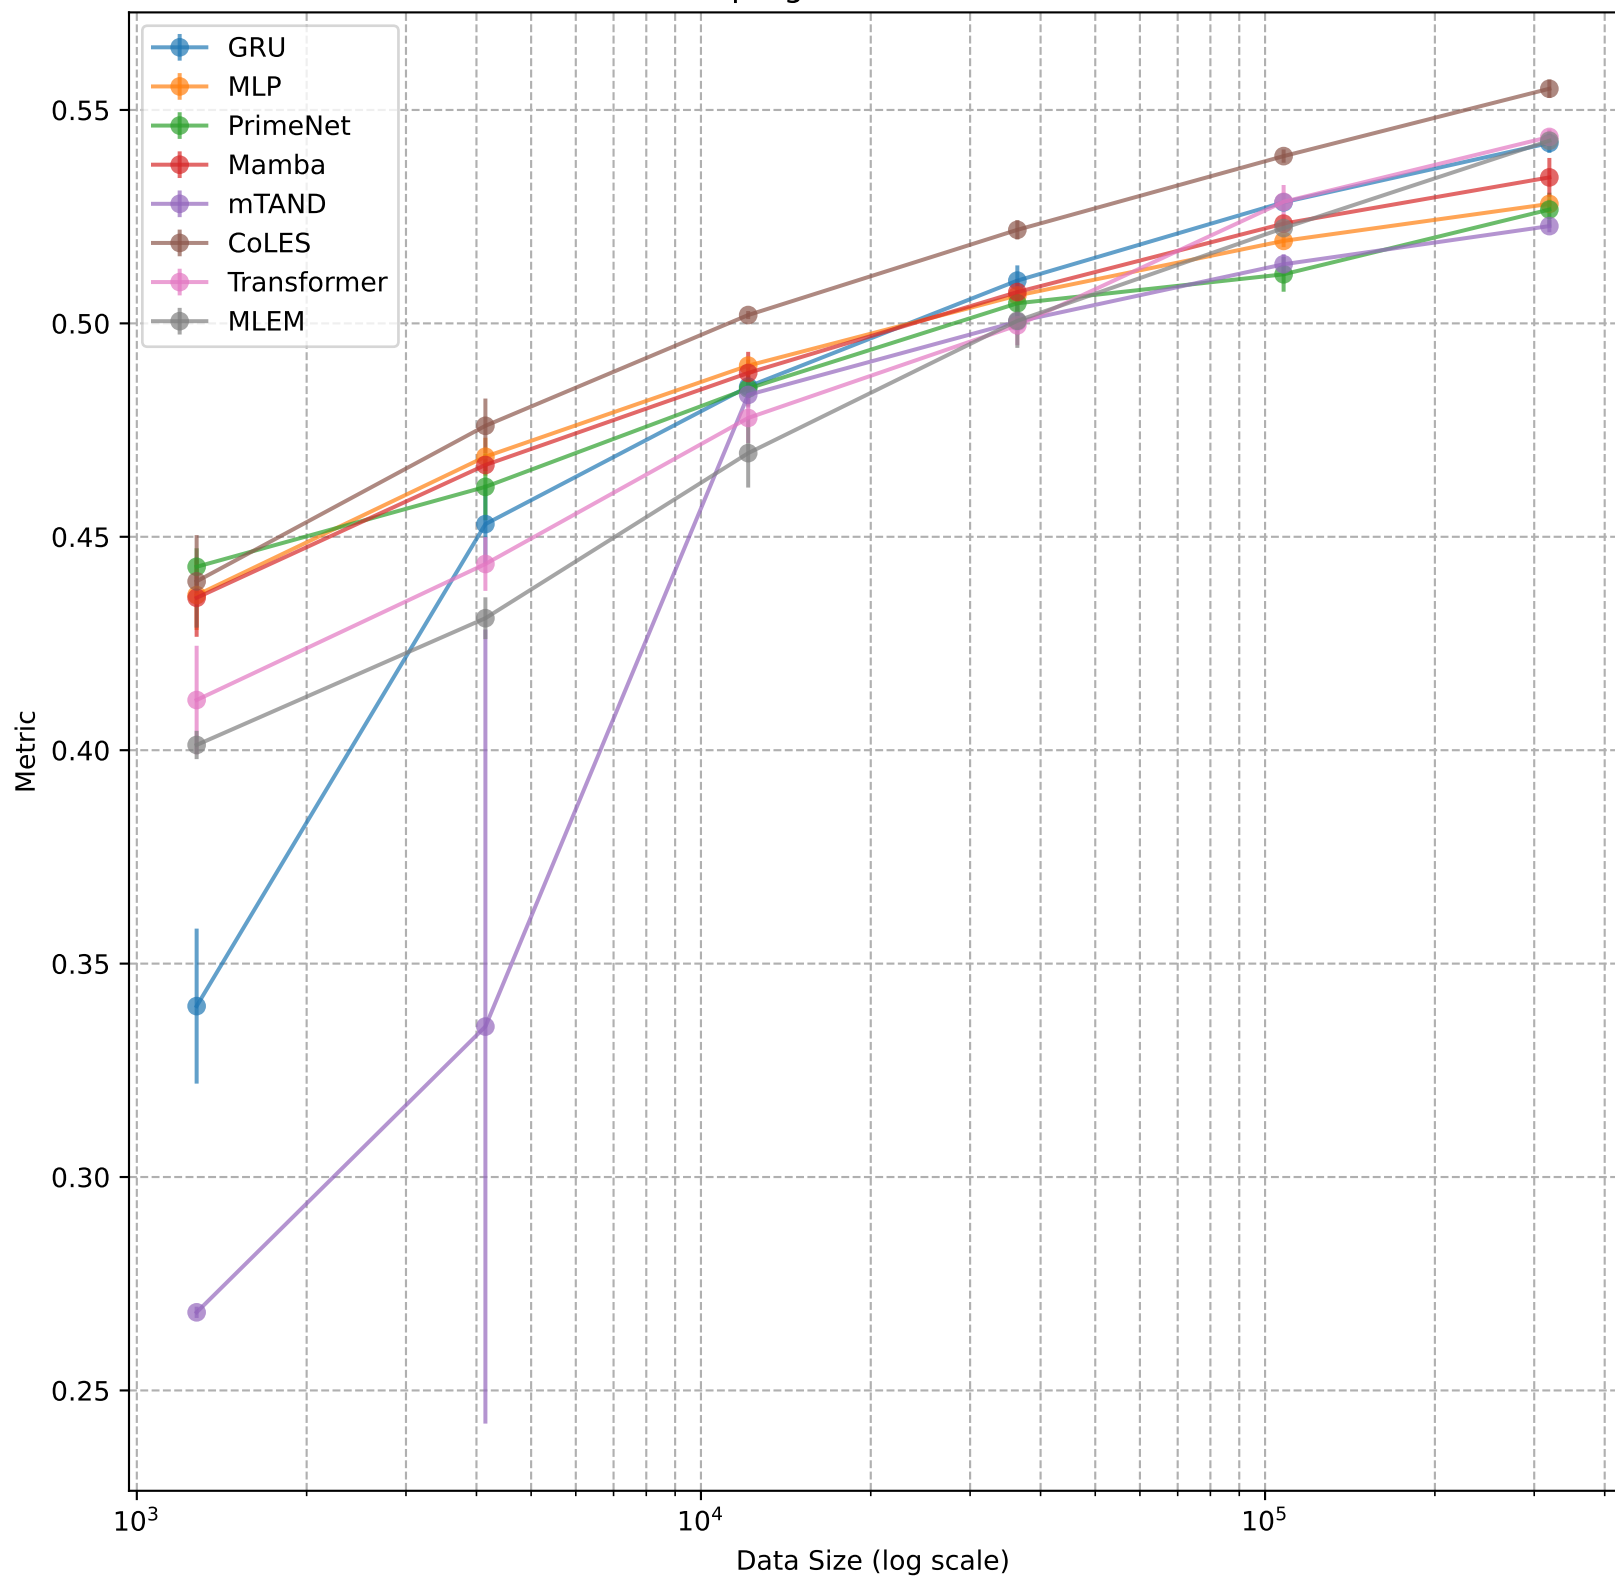

Supplement: supplementary_material [file attachment]

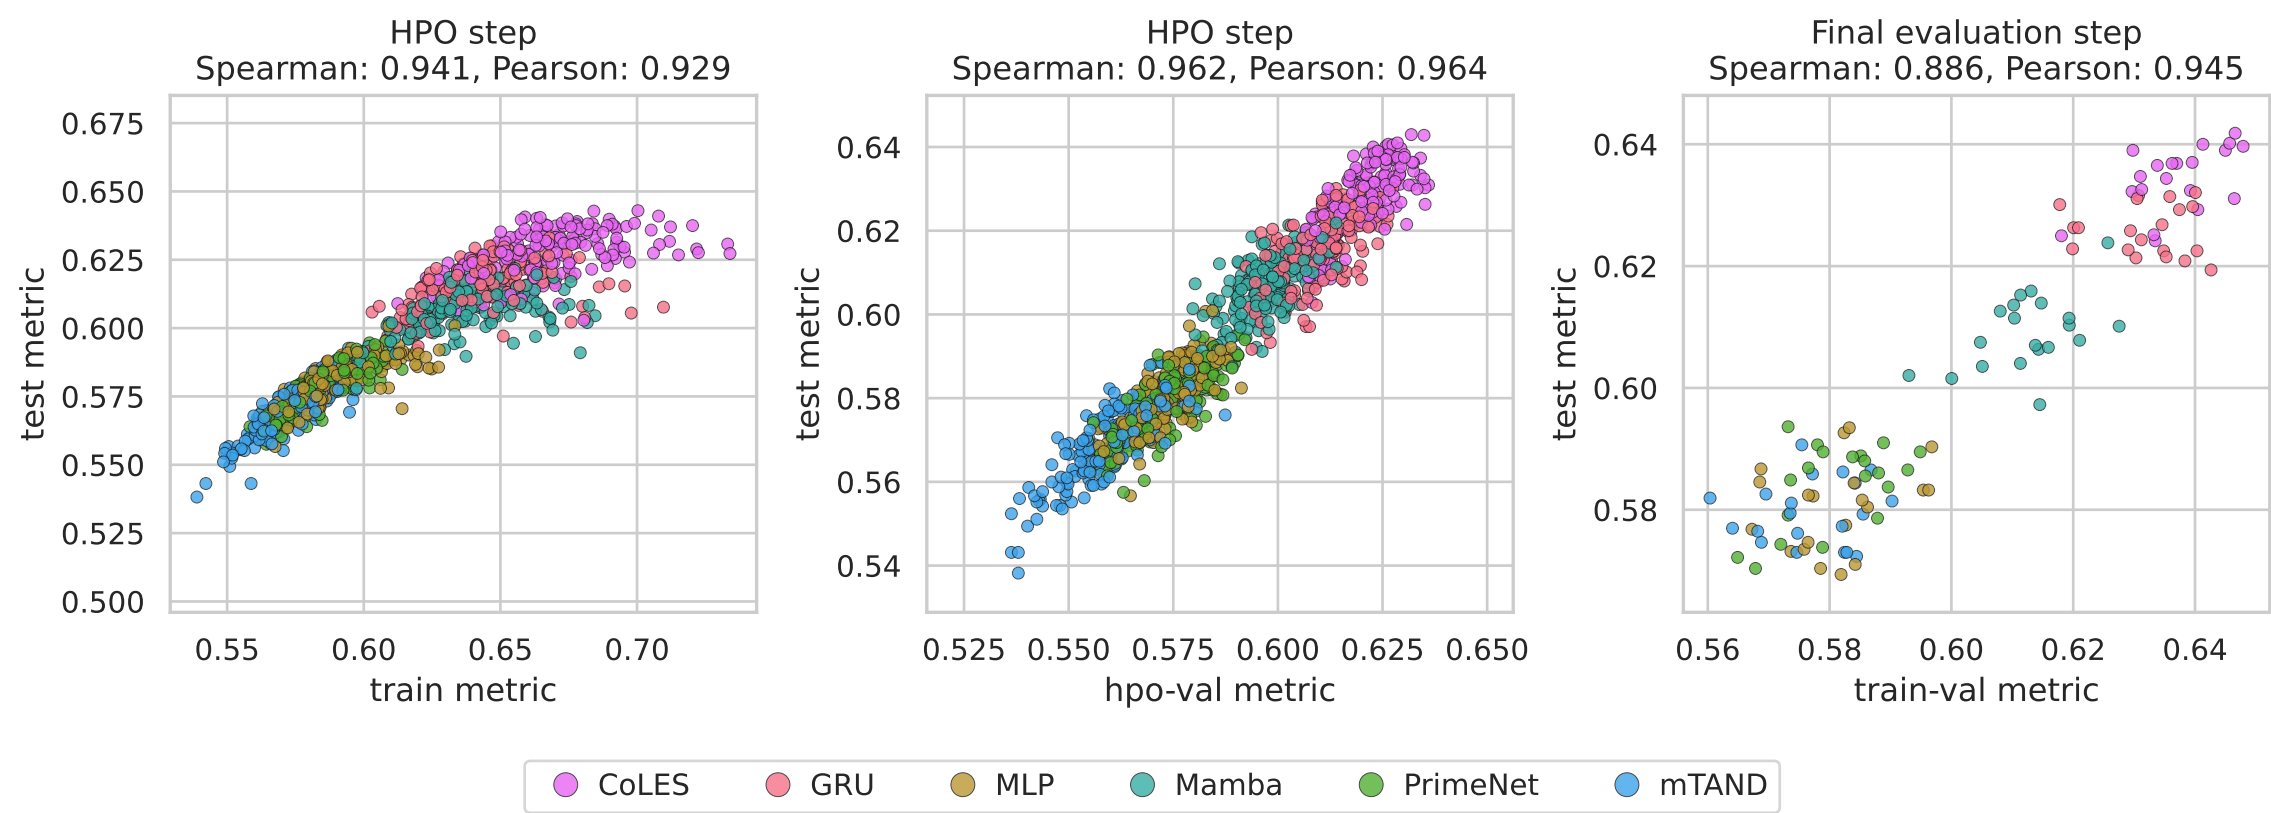

Supplement: supplementary_material [file attachment]

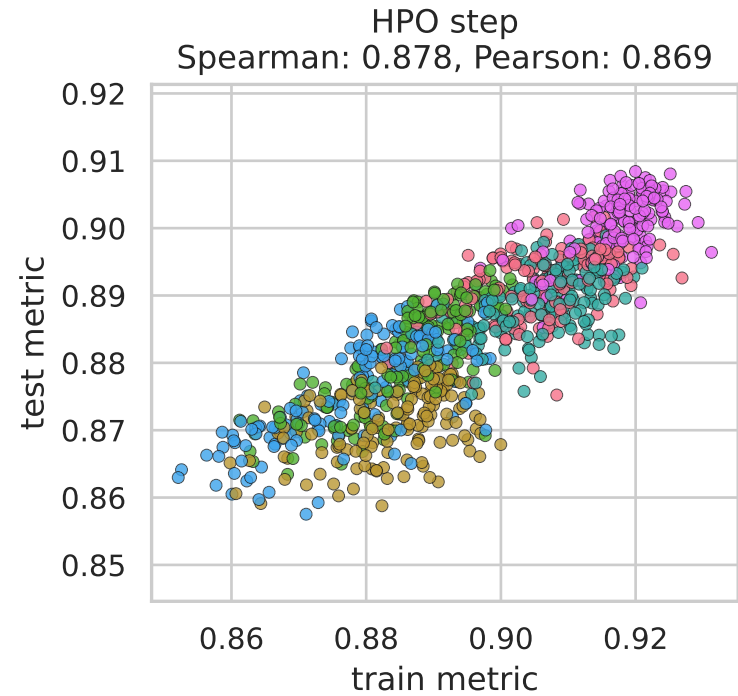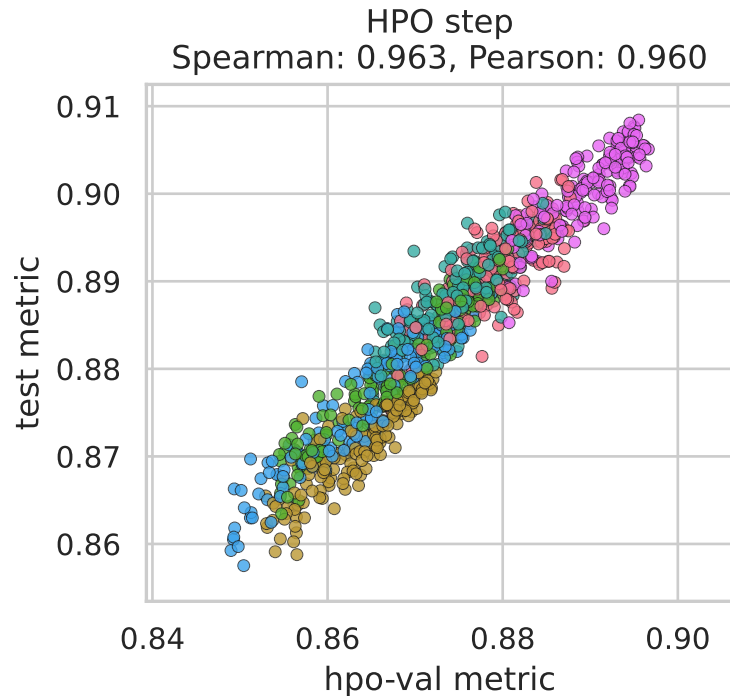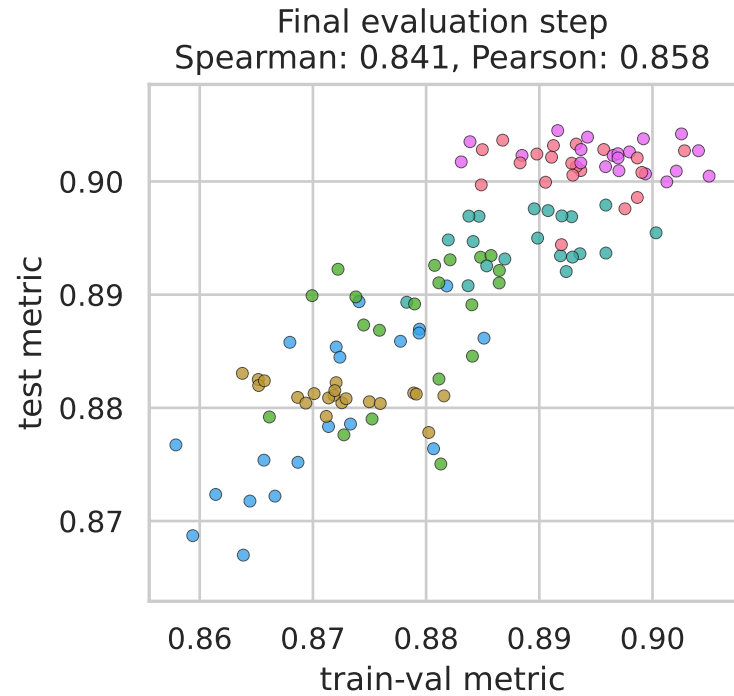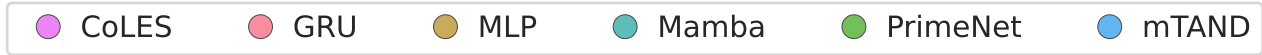

Supplement: supplementary_material [file attachment]

Example of pendulum coordinates. Damping factor=1.366

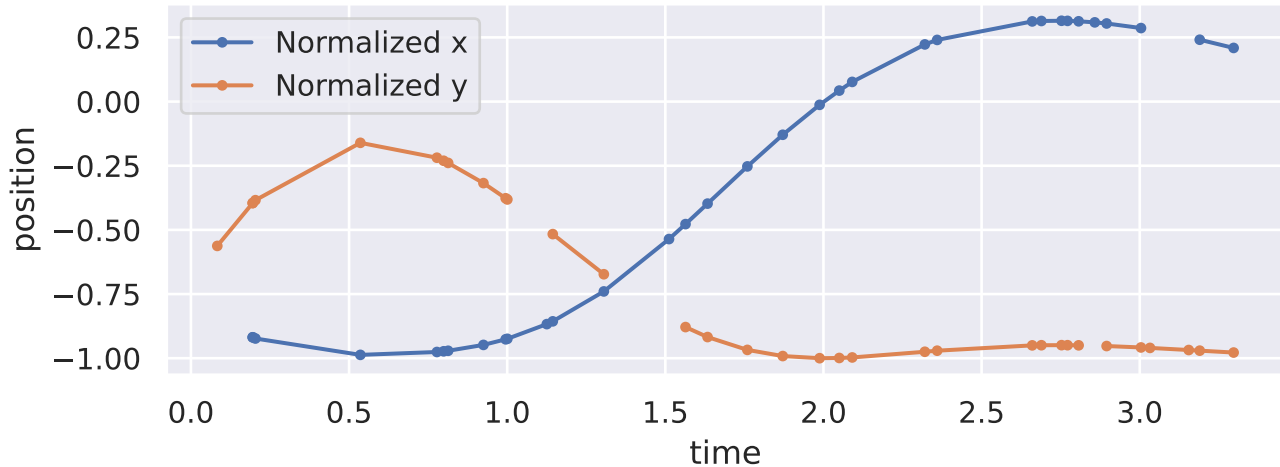

Supplement: supplementary_material [file attachment]

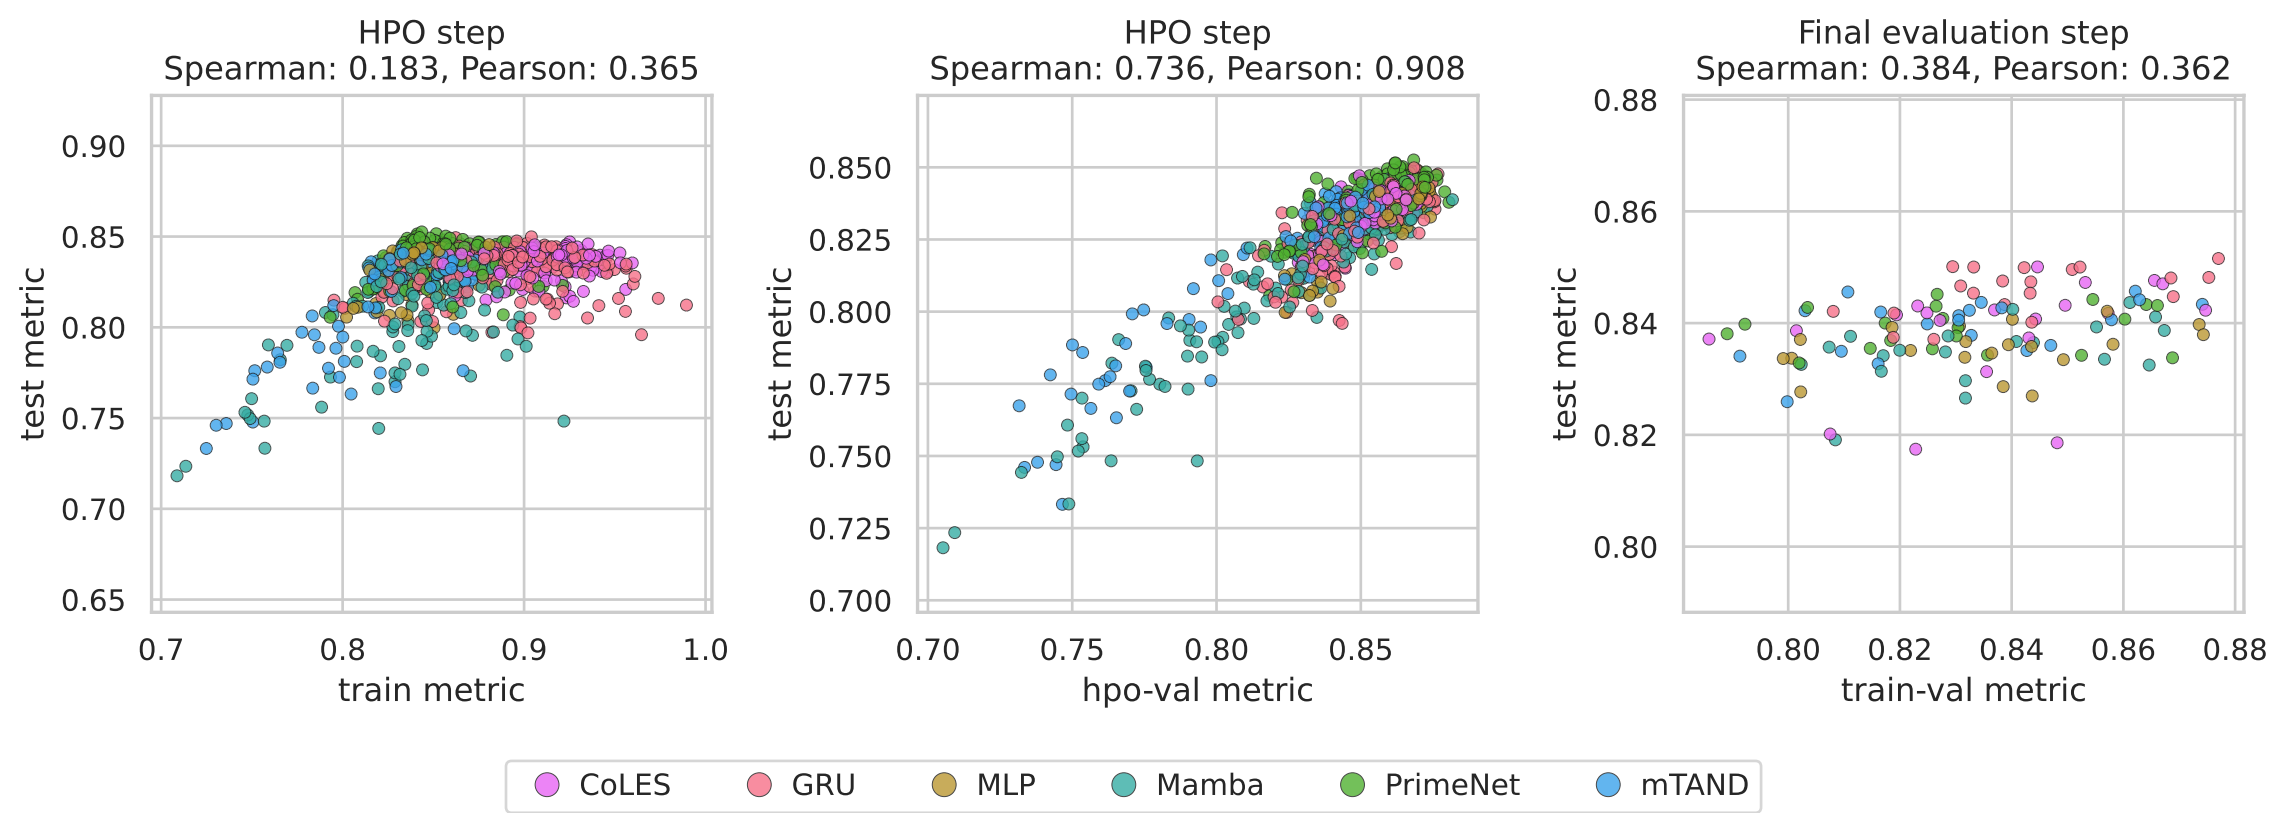

Supplement: supplementary_material [file attachment]

HPO step  
Spearman: 0.937, Pearson: 0.948

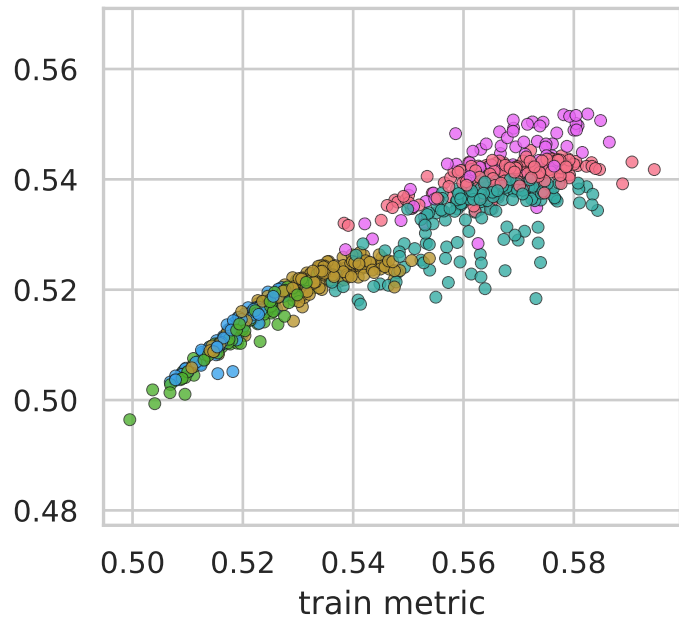

HPO step  
Spearman: 0.986, Pearson: 0.992

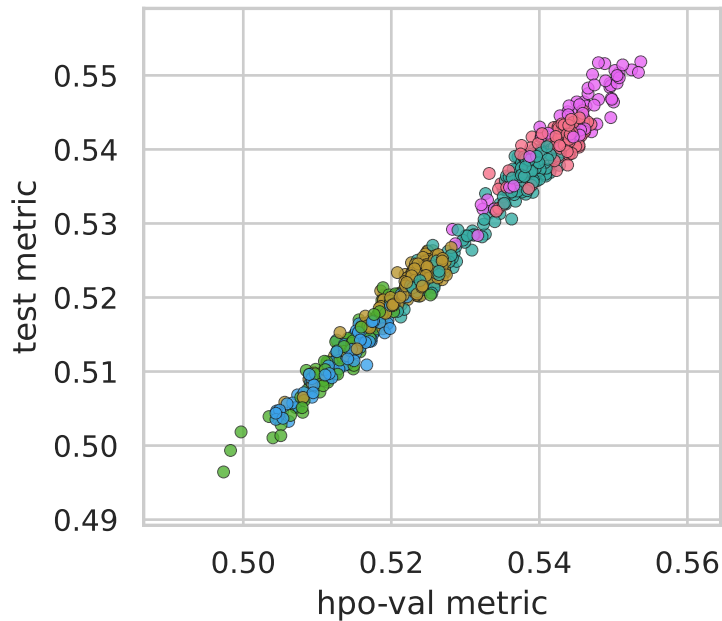

Final evaluation step  
Spearman: 0.981, Pearson: 0.984

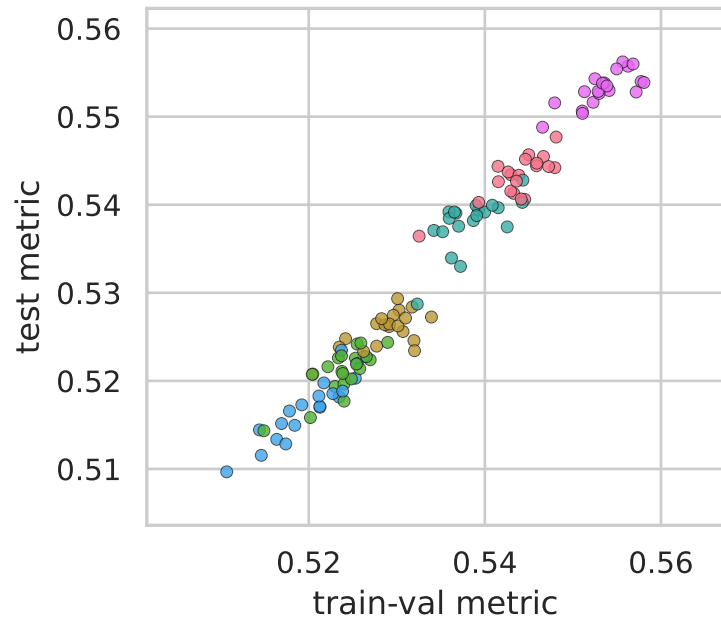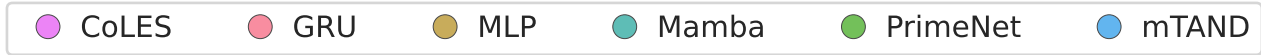

Supplement: supplementary_material [file attachment]

MBD. Metric progression with train data size

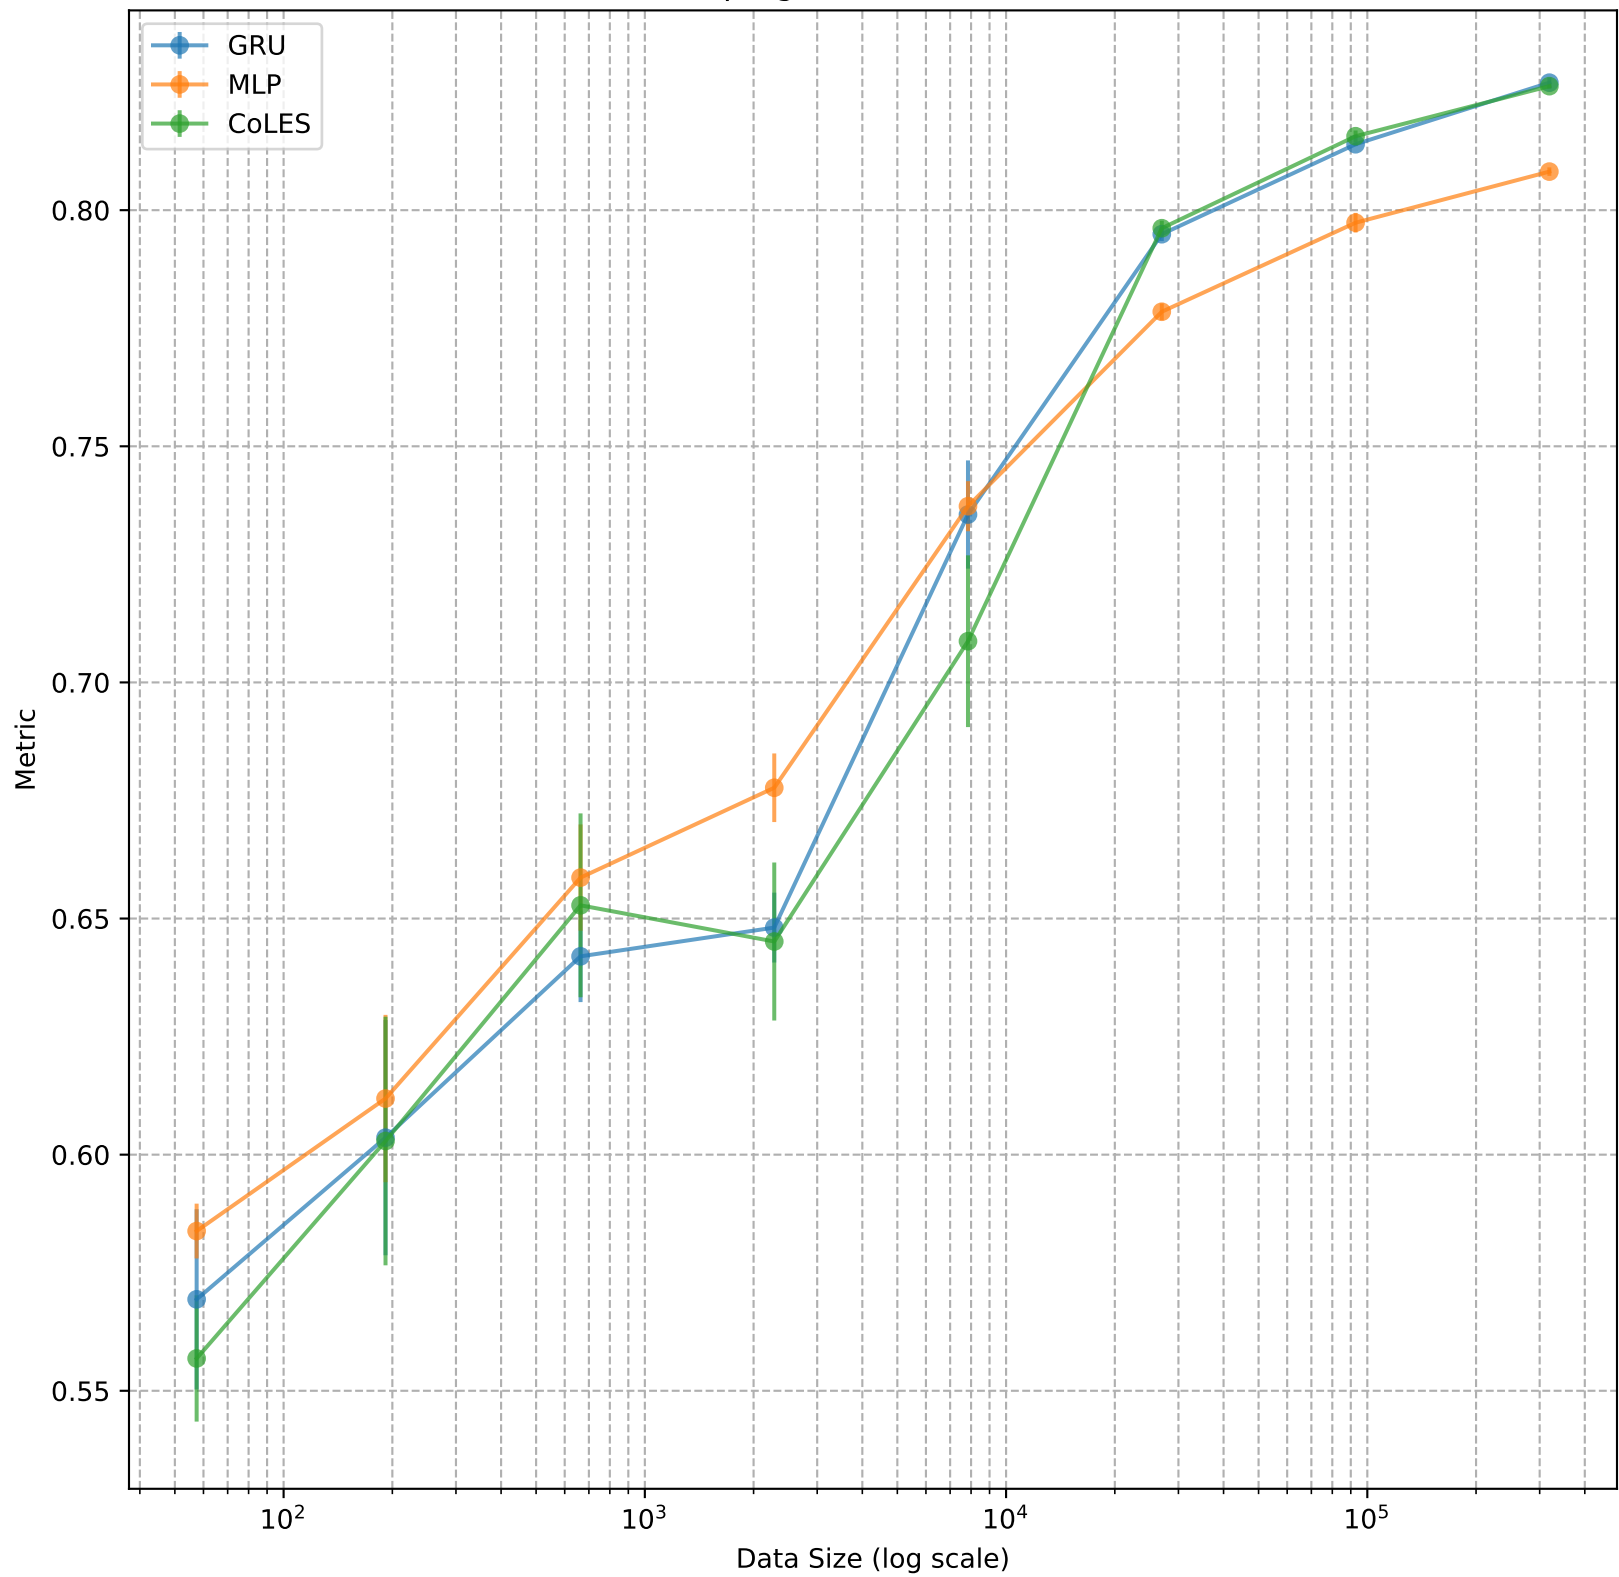

Supplement: supplementary_material [file attachment]
